# Supplementary material
Source: HighWire-hosted journal article supplement (https://cmajopen-stage.highwire.org/highwire/filestream/89645/field_highwire_adjunct_files/0/open-2022-0035-1-at.pdf)
Supplement: open-2022-0035-1-at.pdf [file open-2022-0035-1-at.pdf]

## Appendix 1: Ontario Ministry of Health and Long-Term Care Priority Group Definitions

| Priority | Clinical description                                                                                                                | Target wait time 1 | Target wait time 2 |
|----------|-------------------------------------------------------------------------------------------------------------------------------------|--------------------|--------------------|
| 1        | High probability of disease occurrence or progression impacting morbidity/mortality.                                                | Within 7 days      | Within 24 hours    |
| 2        | Moderate probability of disease progression.<br>Low probability of disease occurrence or progression impacting morbidity/mortality. | Within 30 days     | Within 42 days     |
| 3        | All patients who do not meet the criteria of Priority 2 or 4                                                                        | Within 90 days     | Within 84 days     |
| 4        | Minimal risk of disease progression impacting morbidity/mortality.                                                                  | Within 182 days    | Within 182 days    |
